# Supplementary material for: Irf5 siRNA-loaded biodegradable lipid nanoparticles ameliorate concanavalin A-induced liver injury
Source: PubMed Central journal article supplement — Mol Ther Nucleic Acids. 2021 Sep 10;25:708–15. doi: 10.1016/j.omtn.2021.08.023 (PMC8463440; doi:10.1016/j.omtn.2021.08.023), 2021-09-10
Supplement: mmc1.pdf [file mmc1.pdf]

**Supplemental information**

***Irf5* siRNA-loaded biodegradable**

**lipid nanoparticles ameliorate**

**concanavalin A-induced liver injury**

**Wataru Kawase, Daisuke Kurotaki, Yuta Suzuki, Hiroshi Ishihara, Tatsuma Ban, Go R. Sato, Juri Ichikawa, Hideyuki Yanai, Tadatsugu Taniguchi, Kappei Tsukahara, and Tomohiko Tamura**

## Supplemental Figures

### Figure S1

|                              | AF488-labeled<br>siRNA-LNP | siCtrl-LNP | <i>si/rf5</i> -LNP |
|------------------------------|----------------------------|------------|--------------------|
| Z-average (nm)               | 84                         | 77         | 73                 |
| Polydispersity index         | 0.02                       | 0.03       | 0.05               |
| Encapsulation efficiency (%) | ND                         | > 90       | > 90               |

**Figure S1. Physical properties of the LNPs used in this study**

Z-average indicates the mean value of LNP particle size. The polydispersity index is the width parameter of LNPs. Encapsulation efficiency indicates the percentage of siRNA entrapped into LNPs. ND, not determined.

Figure S2

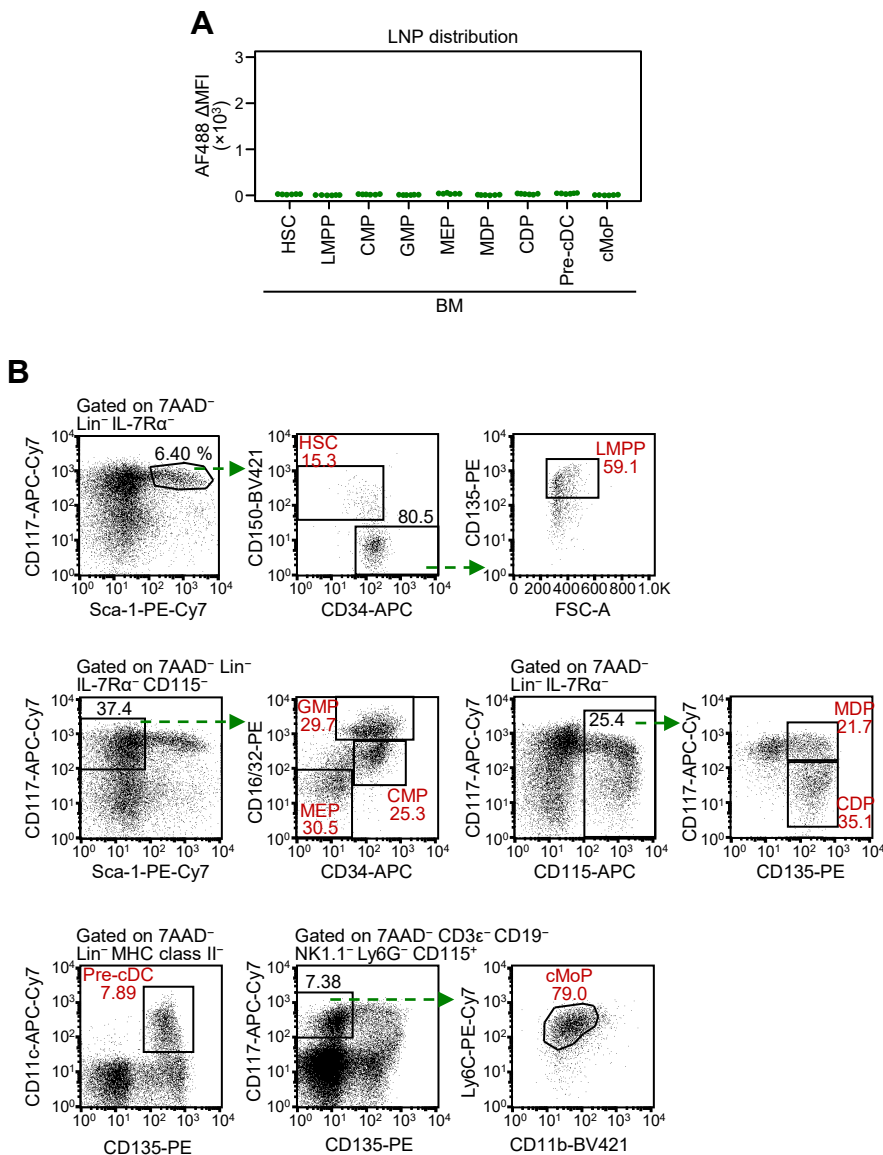

**Figure S2. Analysis of biodegradable LNP uptake into hematopoietic stem and progenitor cells**

Flow cytometry analysis of AF488-labeled siRNA distribution following intravenous injection of LNPs in mice. Hematopoietic stem and progenitor cells in the bone marrow were analyzed 3 h after the intravenous injection of LNPs-encapsulated AF488-labeled siRNA at a dose of 0.8 mg/kg. (A) The MFI of AF488 in each hematopoietic stem and progenitor cell population is shown in boxplots. Values from two independent experiments are shown. (B) Representative dot plots of hematopoietic stem and progenitor populations. HSC, hematopoietic stem cell; LMPP, lymphoid-primed multipotent progenitor; CMP, common myeloid progenitor; GMP, granulocyte monocyte progenitor; MEP, megakaryocyte erythroid progenitor; MDP, monocyte dendritic cell progenitor; CDP, common dendritic cell progenitor; pre-cDC, committed classical dendritic cell precursor; cMoP, common monocyte progenitor.

Figure S3

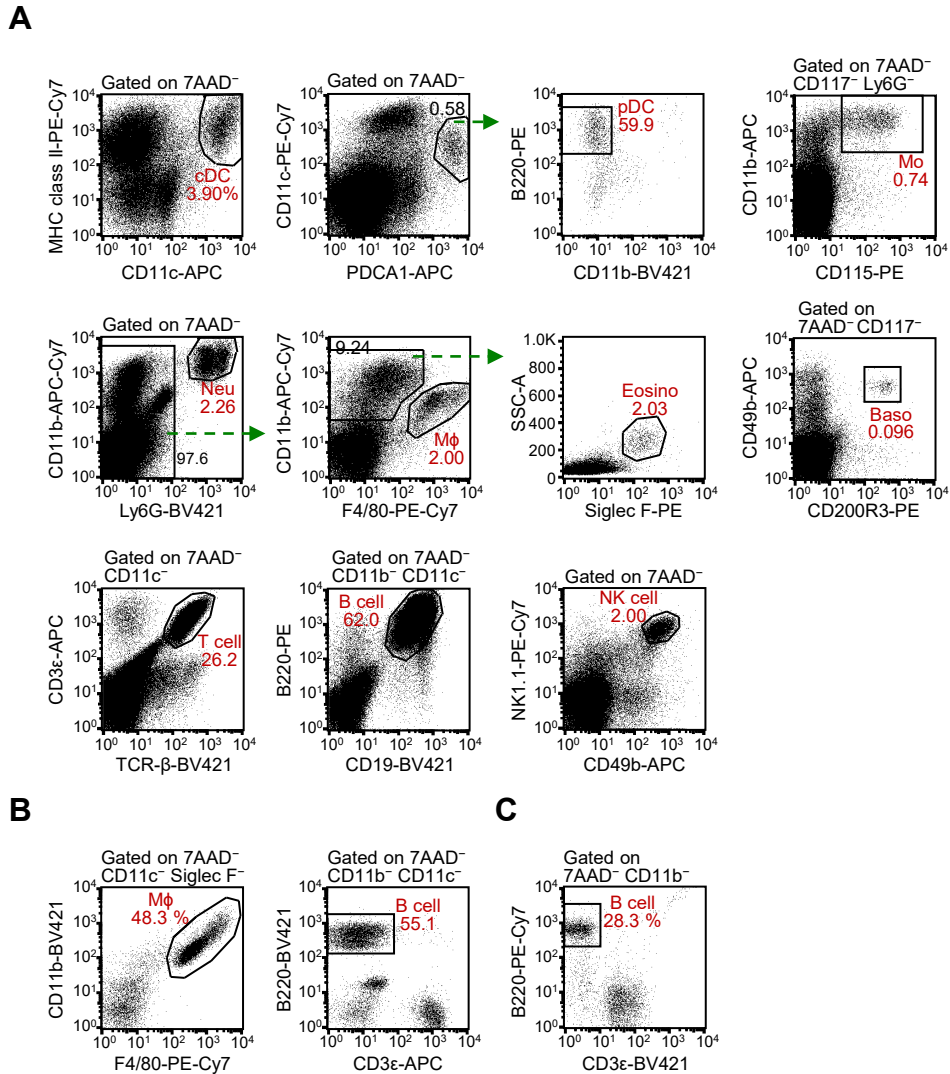

**Figure S3. Incorporation of biodegradable LNPs in splenocytes**

Flow cytometry gating strategy for immune cells in the spleen (A), peritoneal exudate cells (B), and the liver (C). cDC, conventional dendritic cell; pDC, plasmacytoid dendritic cell; Mo, monocyte; M $\phi$ , macrophage; Neu, neutrophil; Eosino, eosinophil; Baso, basophil.

Figure S4

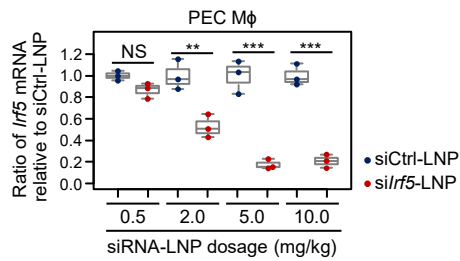

**Figure S4. Dose-dependent *Irf5* silencing effect of biodegradable LNPs**

Mice were injected with siCtrl-LNPs or si*Irf5*-LNPs at siRNA doses of 0.5, 2.0, 5.0, and 10.0 mg/kg. Twenty-four hours after LNP administration, *Irf5* mRNA expression in peritoneal Mφs was analyzed by qRT-PCR. Values were normalized to the expression levels of *Gapdh* using the  $\Delta\Delta$ CT method. The relative expression values to the mean of siCtrl-LNP values were calculated. Data from three independent experiments are presented. \*\* $p < 0.01$ , \*\*\* $p < 0.001$  (Student's *t* test). NS, not significant.

Figure S5

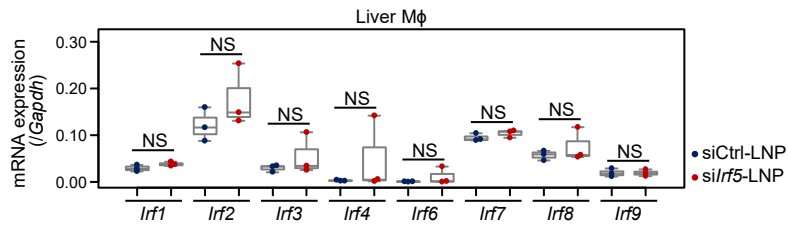

**Figure S5. mRNA expression of IRF family transcription factors after injection of LNPs**

Mice were injected with siCtrl-LNPs and siIrf5-LNPs at a siRNA dose of 5.0 mg/kg. Twenty-four hours after LNP administration, the mRNA expression of IRF family transcription factors in liver F4/80<sup>+</sup>CD11b<sup>+</sup> Mφs was analyzed by qRT-PCR. Values were normalized to *Gapdh* levels using the  $\Delta\Delta CT$  method. Data from three independent experiments are presented. NS, not significant.

Figure S6

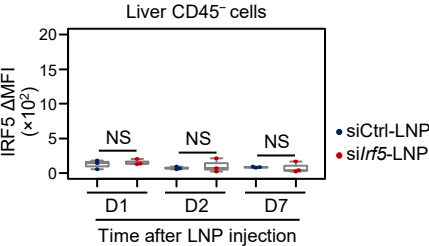

**Figure S6. IRF5 protein expression of CD45<sup>-</sup> cells in the liver**

After LNP administration, IRF5 protein expression in liver CD45<sup>-</sup> cells were analyzed by immunofluorescence staining at indicated time points. Boxplots indicate ΔMFI of IRF5 expression. Data from three independent experiments are shown. NS, not significant.
